# Supplementary material
Source: publisher figshare collection journal article supplement (https://frontiersin.figshare.com/ndownloader/files/12480116)
Supplement: Supplementary file [file 12480116]

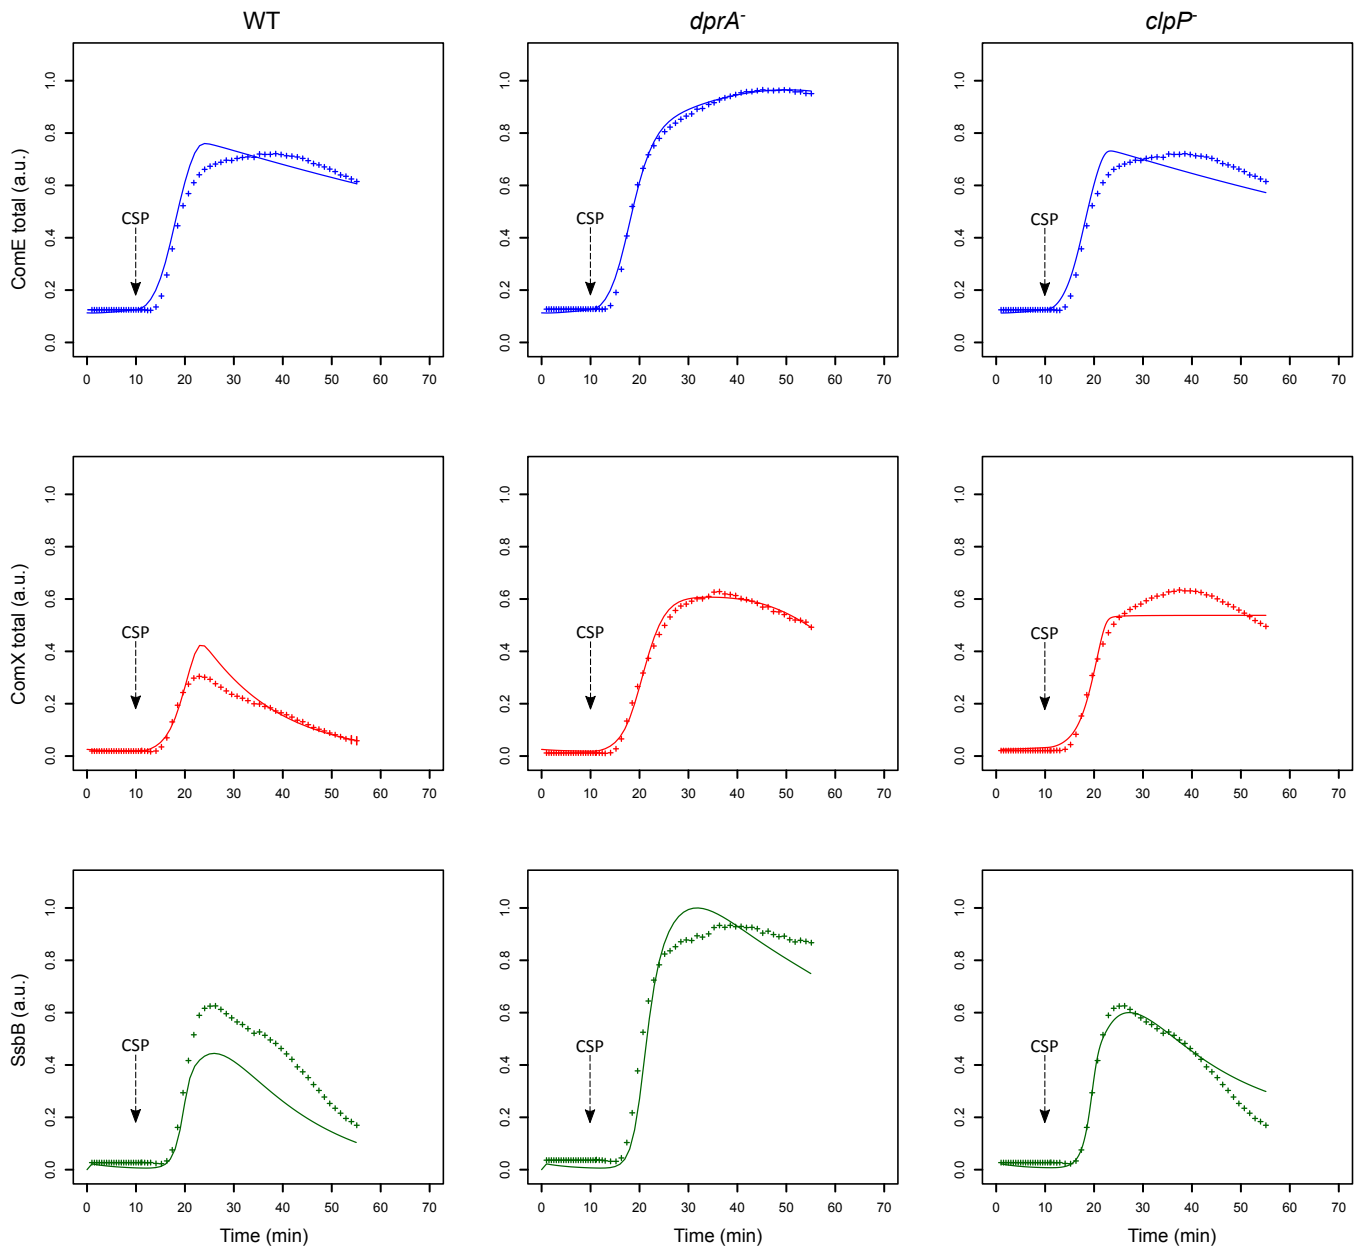

**Figure S7. Comparison of the experimental and simulated protein kinetics obtained with the model where an early gene product ComZ and the active form of ComX compete for binding to RNA polymerase.** Comparison of simulated data with the experimental measurements are shown for the WT strain, the *dprA* mutant strain and the *clpP* mutant strain. Symbolisms and color code are the same as in Figure S4 as well as the simulated protocol.
